# Supplementary material
Source: HighWire-hosted journal article supplement (https://bjo.bmj.com/content/104/4/541)
Supplement: inline-supplementary-material-1 [file inline-supplementary-material-1.pdf]

**Supplemental material**

eTable 1. Demographics of prematurely born individuals from the 10-year follow-up<sup>12</sup> who attended and those who did not attend the 25-year follow-up study

|                                         | <b>Attended</b> | <b>Did not attend</b> | <b>p-value</b> |
|-----------------------------------------|-----------------|-----------------------|----------------|
|                                         | 58/216          | 158/216               |                |
| GA (weeks)                              | 29.3            | 29.1                  | ns             |
| BW (grams)                              | 1169            | 1166                  | ns             |
| Female gender                           | 37 (64%)        | 74 (47%)              | 0.02           |
| Previous ROP                            | 24 (41%)        | 61 (39%)              | ns             |
| Previously treated for ROP              | 13 (22%)        | 12 (8%)               | 0.004          |
| Neurological complications at 2.5 years | 8 (14%)         | 24 (15%)              | ns             |
| Mean logMAR VA at 10 years              | RE -0.03        | RE -0.02              | ns             |
|                                         | LE: -0.03       | LE -0.01              | ns             |

BW=birth weight, GA=gestational age, LE=left eye, ns=non-significant, RE=right eye, ROP=retinopathy of prematurity, VA=visual acuity.
